# Supplementary material for: A nationwide causal mediation analysis of survival following ST-elevation myocardial infarction
Source: PubMed Central journal article supplement (PMC7229897; doi:10.1136/heartjnl-2019-315760), 2019-11-15
Supplement: heartjnl-2019-315760supp001.pdf [file heartjnl-2019-315760supp001.pdf]

**SUPPLEMENTAL MATERIAL****A nationwide causal mediation analysis of survival following ST-elevation Myocardial Infarction****Authors**

Tatendashe B Dondo (PhD), Marlous Hall (PhD), Theresa Munyombwe (PhD), Chris Wilkinson (MRCP), Mohammad E Yadegarfar (PhD), Adam D Timmis (FRCP), Phillip D Batin (FRCP), Tomas Jernberg (FRCP), Keith AA Fox (FRCP), Chris P Gale (FRCP).

## Section 1

**eTable 1.** Mapping of care interventions for the management of STEMI to MINAP data fields.

| <b>Care intervention</b>          | <b>Eligibility Criteria</b>                                                                                                                                                                                                                                                                             | <b>Opportunity Received</b>                                                    |
|-----------------------------------|---------------------------------------------------------------------------------------------------------------------------------------------------------------------------------------------------------------------------------------------------------------------------------------------------------|--------------------------------------------------------------------------------|
| <b>Aspirin</b>                    |                                                                                                                                                                                                                                                                                                         |                                                                                |
| At Discharge                      | If discharged on aspirin (4.08) is not =2 (contraindicated), 3 (patient declined treatment), 4 (not applicable) or 8 (not indicated), as recorded in MINAP.                                                                                                                                             | Discharged on aspirin (4.08)=1 (yes)                                           |
| <b>P2Y<sub>12</sub> inhibitor</b> |                                                                                                                                                                                                                                                                                                         |                                                                                |
| At Discharge                      | If discharged on thienopyridine (4.27) is not =2 (contraindicated), 3 (patient declined treatment), 4 (not applicable) or 8 (not indicated)<br>Or if discharged on ticagrelor is not =2 (contraindicated), 3 (patient declined treatment), 4 (not applicable), 8 (not indicated), as recorded in MINAP. | If discharged on thienopyridine=1 (yes) or if discharged on ticagrelor=1 (yes) |
| <b>β-Blocker</b>                  |                                                                                                                                                                                                                                                                                                         |                                                                                |

|                             |                                                                                                                                                                      |                                                                                                                      |
|-----------------------------|----------------------------------------------------------------------------------------------------------------------------------------------------------------------|----------------------------------------------------------------------------------------------------------------------|
| At Discharge                | If discharged on $\beta$ blockers (4.05) is not =2 (contraindicated), 3 (patient declined treatment), 4 (not applicable) or 8 (not indicated), as recorded in MINAP. | If discharged on beta blocker(4.05)=1 (yes)                                                                          |
| <b>ACEi/ARBs</b>            |                                                                                                                                                                      |                                                                                                                      |
| At Discharge                | If discharged on ACEi/ARB (3.32/4.06) is not =2 (contraindicated), 3 (patient declined treatment), 4 (not applicable) or 8 (not indicated), as recorded in MINAP.    | If ACEi/ARB (3.32)=1 (yes)<br>OR if discharged ACEi/ARB (4.06)=1 (yes)                                               |
| <b>Statin</b>               |                                                                                                                                                                      |                                                                                                                      |
| At Discharge                | If discharged on statin (4.07) is not =2 (contraindicated), 3 (patient declined treatment), 4 (not applicable) or 8 (not indicated), as recorded in MINAP.           | If statin (4.07)=1 (yes)                                                                                             |
| <b>Reperfusion strategy</b> |                                                                                                                                                                      |                                                                                                                      |
| PPCI                        | If reason no reperfusion (3.08) was given is not= 1 (ineligible ECG), 2 (too late), 3 (risk of haemorrhage), 4 (uncontrolled hypertension), 5                        | If initial_reperfusion (3.39)= 2 (PPCI in house), 3 (referred for consideration for PPCI elsewhere), 4 (PPCI already |

|                                            |                                                                                                                                                                                                                                             |                                                                                                                                                 |
|--------------------------------------------|---------------------------------------------------------------------------------------------------------------------------------------------------------------------------------------------------------------------------------------------|-------------------------------------------------------------------------------------------------------------------------------------------------|
|                                            | (administrative failure), 6 (elective decision), 7 (patient refused treatment) or 8 (other).                                                                                                                                                | was performed at the interventional hospital)                                                                                                   |
| Thrombolysis                               | If reason no reperfusion (3.08) was given is not = 1 (ineligible ECG), 2 (too late), 3 (risk of haemorrhage), 4 (uncontrolled hypertension), 5 (administrative failure), 6 (elective decision), 7 (patient refused treatment) or 8 (other). | If lytic (3.36) =1 (Streptokinase), 2 (Alteplase), 3 (Retepase) or 4 (Tenecteplase) or initial_reperfusion (3.39) = 1 (thrombolytic treatment). |
| <b>Referral for Cardiac Rehabilitation</b> | All patients eligible unless not indicated<br><br>If cardiac rehabilitation (4.09) is not =3 (patient declined treatment) or 8 (not indicated), as recorded in MINAP.                                                                       | If cardiac rehabilitation (4.09)=1 (yes)                                                                                                        |

**Abbreviations:** ACEi – angiotensin-converting enzyme inhibitor; ARBs – Angiotensin receptor blocker; ECG – electrocardiogram; PPCI – primary percutaneous coronary intervention; MINAP- Myocardial Ischaemia National Audit Project.

## Section 2

### Flexible parametric survival modelling

**eTable 2.** Choice of scale and degrees of freedom for the flexible parametric survival model determined by minimisation of the Akaike's Information Criterion and Bayes Information Criterion.

| AIC and BIC Ranges Over 10 Imputed Data Sets |                       |                       |                       |                       |                       |                       |                       |                       |
|----------------------------------------------|-----------------------|-----------------------|-----------------------|-----------------------|-----------------------|-----------------------|-----------------------|-----------------------|
| df                                           | Normal                |                       | Theta                 |                       | Odds                  |                       | Hazard                |                       |
|                                              | AIC                   | BIC                   | AIC                   | BIC                   | AIC                   | BIC                   | AIC                   | BIC                   |
| 1                                            | 44583.12-<br>59707.10 | 44766.77-<br>59892.90 | 44679.12-<br>59838.09 | 44869.10-<br>60030.52 | 44763.57-<br>59949.11 | 44947.22-<br>60134.91 | 44802.32-<br>60001.58 | 44985.97-<br>60187.38 |
| 2                                            | 44362.39-<br>59388.40 | 44552.38-<br>59580.83 | 44447.19-<br>59497.81 | 44643.50-<br>59696.88 | 44469.44-<br>59520.88 | 44659.42-<br>59713.32 | 44491.38-<br>59548.08 | 44681.36-<br>59740.51 |
| 3                                            | 44356.42-<br>59383.37 | 44552.74-<br>59582.44 | 44441.39-<br>59491.35 | 44644.04-<br>59697.06 | 44463.05-<br>59513.45 | 44659.36-<br>59712.52 | 44484.70-<br>59540.26 | 44681.01-<br>59739.33 |

|   |                                                   |                                                   |                       |                       |                       |                       |                       |                       |
|---|---------------------------------------------------|---------------------------------------------------|-----------------------|-----------------------|-----------------------|-----------------------|-----------------------|-----------------------|
| 4 | 44339.93-<br>59348.65                             | 44542.58-<br>59554.36                             | 44422.30-<br>59451.52 | 44631.28-<br>59663.86 | 44442.99-<br>59471.96 | 44645.64-<br>59677.67 | 44464.42-<br>59498.20 | 44667.07-<br>59703.91 |
| 5 | <b><u>44324.97-</u></b><br><b><u>59322.65</u></b> | <b><u>44533.95-</u></b><br><b><u>59534.99</u></b> | 44405.02-<br>59421.74 | 44620.33-<br>59640.72 | 44425.09-<br>59441.33 | 44634.07-<br>59653.68 | 44446.35-<br>59467.28 | 44655.33-<br>59679.62 |

**Abbreviations:** AIC- Akaike's Information Criterion; BIC- Bayes Information Criterion; df-degrees of freedom.

## Section 2

### Mediation analysis

A mediation analysis was conducted to determine the proportion of temporal improvements in survival that were mediated by use of PPCI and prescription of P2Y<sub>12</sub> inhibitors at hospital discharge (eFigure 1). Details on the method and R package used for the analyses have been described elsewhere.[1, 2] The mediation analysis was undertaken on complete cases (n=137,111) and across each of the ten imputed datasets separately as methods to pool the estimates to the best of our knowledge have not been established.

**eFigure 1.** A path diagram indicating the use of PPCI and prescription of P2Y<sub>12</sub> inhibitors at hospital discharge as potential mediators for the temporal trend in survival.

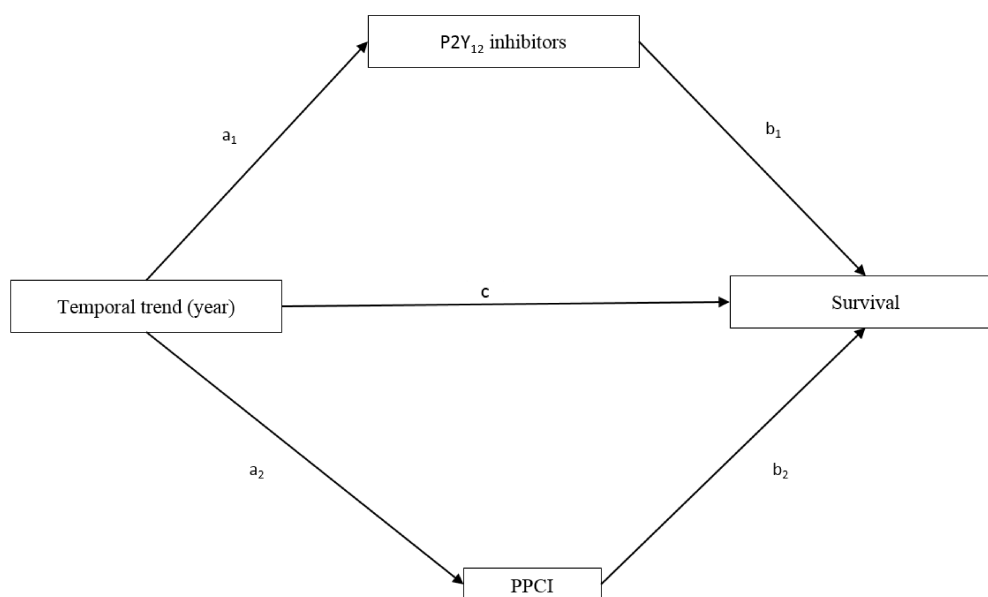

Since two potential mediators were determined in the primary analysis (eFigure 1), two independent single mediator models for the hypothesised mediators (PPCI and prescription of

P2Y12 inhibitors at hospital discharge) were fitted. For each model average total effects (ATE), average causal mediation effect (ACME), average direct effect (ADE), and the proportion mediated by the hypothesised mediators were determined. Average direct effects (ADE) are defined as the intervention effects on outcome after excluding the mediator effects (represented by path  $c$  in eFigure 1), while the ACME is defined as the intervention effect on the outcome via the mediator (represented by paths  $a_1$ ,  $a_2$ ,  $b_1$  and  $b_2$  in eFigure 1).[2, 3] The ATE is the sum of ADE and ACME, which is defined as the total intervention effects on the outcome.[2, 3] The proportion mediated is the fraction of ATE that is explained by ACME.[2, 3] The ACME and ADE are estimated under the potential outcomes framework whereby the impact of the mediator on the outcome is quantified comparing impact on outcomes if everyone in the population received treatment/mediating variable vs. if no one in the population received treatment/mediating variable.[3] The potential outcomes come into play in the sense that not everyone has an observed outcome if shifted to the different treatment groups other than their observed treatment group, thus the employment of counterfactual outcomes (potential outcomes).[3]

For each of the mediators, two regression models were fitted, i.e. the mediator model (to quantify ACME) and the outcome model (to quantify ATE). In the mediator model, year of admission was the independent variable and the hypothesised mediator as the dependent variable. However, in order to infer causal inference the mediation analysis's main assumption: the sequential ignorability assumption must not be violated. The sequential ignorability assumption assumes that the mediator is effectively randomly assigned given pre-intervention covariates and the randomised treatment.[4] Given that in observational studies, potential bias may arise at either treatment assignment or mediator stage [4], the mediator models were adjusted for pre-intervention covariates. The pre-intervention covariates included: age, sex, deprivation (Index of Multiple Deprivation score), diabetes,



hypercholesterolaemia, hypertension, smoking status, family history of coronary heart disease, chronic obstructive pulmonary disease, cerebrovascular disease, peripheral vascular disease, previous history of AMI, previous history of angina, previous coronary revascularisation, previous coronary artery bypass graft. This was done to ensure that the mediating variables were as good as randomised conditional on the pre-intervention covariates adjusted for in the mediator models. Thus allowing for interpretation of paths  $b_1$  and  $b_2$  as causal because individuals within each treatment group attaining different levels of the mediator would be similar. For the outcome models, we used a Poisson regression modelling framework with log survival time as the offset (in the absence of software packages available to fit flexible parametric survival models for mediation analysis).

The outcome models were adjusted for patient demographics (sex, deprivation (index of multiple deprivation score)), cardiovascular risk factors (diabetes, hypercholesterolaemia, hypertension, smoking status, chronic obstructive pulmonary disease (COPD), family history of coronary heart disease, previous history of AMI, previous history of angina, previous coronary revascularisation, previous coronary artery bypass graft), cardiovascular history (cerebrovascular disease, peripheral vascular disease), discharge medications (statins, aspirin, angiotensin converting enzyme inhibitors (ACEi)/angiotensin receptor blockers (ARB)) and cardiac rehabilitation. Cardiac rehabilitation was added only to the outcome models because it is a post intervention variable and therefore could not be included in the mediator model as a pre-intervention covariate. To take into account the mediated effect of the other mediator, they were adjusted for in each of the outcome models in turn. However, this can prove a limitation if the indirect effects of the mediators have an opposite signs, it can result to the indirect effects either cancelling each other out if the effect sizes are the same (thus resulting to no effect being mediated) or an underestimation of the proportion mediated if the indirect effects are not the same size.[5] In this analysis, the indirect effects were assumed to have the

same sign as all the mediators had the same impact on survival of the STEMI patients. This assumption was confirmed to hold true as none of the total effects from the individual models for each of the mediators were found to be zero (eTable 6 and eTable 7). The mediate function was used to estimate ATE, ACME, ADE and the proportion mediated by determined mediators.[2]

The modelling approach was undertaken for the both the primary and secondary outcomes, i.e. one year and six months survival, respectively. Results of the findings are given in eTable 6 and eTable 7.

### Section 3

#### Multiple Imputation

Multiple imputations by chained equations (MICE)[6] were used to create 10 imputed datasets for missing data for all components of the GRACE risk score and other patient demographic variables. A default imputation (missing data default imputed to “NO”) strategy based on clinical expert opinion was implemented for cardiovascular history, cardiovascular risk factors, and categorical treatment variables.[6, 7] The imputation models were based on previous work. The imputation model used is defined in detail in eTable 3. Predictive mean matching was used for continuous variables with nonlinear associations.

**eTable 3.** Imputation Strategy

| <b>Variable</b>                               | <b>Variable Type</b> | <b>Missing (%)</b> | <b>Imputation method</b>                    |
|-----------------------------------------------|----------------------|--------------------|---------------------------------------------|
| Cardiac arrest                                | Binary               | 7.9                | Logistic regression                         |
| Uncensored peak troponin measurement in ng/ml | Continuous           | 22.0               | Predictive mean matching                    |
| Age                                           | Continuous           | 0.1                | Predictive mean matching                    |
| Systolic blood pressure                       | Continuous           | 18.5               | Predictive mean matching                    |
| Heart rate                                    | Continuous           | 18.1               | Predictive mean matching                    |
| Loop diuretic used                            | Binary               | 20.4               | Logistic regression                         |
| Creatinine level                              | Continuous           | 41.2               | Predictive mean matching                    |
| Ethnicity                                     | Categorical          | 11.8               | Polytomous regression                       |
| Sex                                           | Binary               | 0.3                | Logistic regression                         |
| Index of multiple deprivation score           | Continuous           | 7.6                | Predictive mean matching                    |
| Derived identification                        | Continuous           | 0                  | Predictor/ Auxiliary<br>/Partially Observed |
| Arrival year                                  | Continuous           | 0                  | Predictor/ Auxiliary<br>/Partially Observed |
| Nelson-Aalen survival estimate                | Continuous           | 0                  | Predictor/ Auxiliary<br>/Partially Observed |

| <b>Variable</b>                              | <b>Variable Type</b> | <b>Missing (%)</b> | <b>Imputation method</b>                 |
|----------------------------------------------|----------------------|--------------------|------------------------------------------|
| Censoring indicator                          | Binary               | 0                  | Predictor/ Auxiliary /Partially Observed |
| Hypercholesterolaemia                        | Binary               | 12.9               | Predictor/ Auxiliary and Default imputed |
| Previous hypertension                        | Binary               | 9.5                | Predictor/ Auxiliary and Default imputed |
| Previous myocardial infarction               | Binary               | 9.1                | Predictor/ Auxiliary and Default imputed |
| Previous angina                              | Binary               | 10.4               | Predictor/ Auxiliary and Default imputed |
| Previous PCI                                 | Binary               | 11.0               | Predictor/ Auxiliary and Default imputed |
| Previous CABG                                | Binary               | 10.8               | Predictor/ Auxiliary and Default imputed |
| Peripheral vascular disease                  | Binary               | 12.6               | Predictor/ Auxiliary and Default imputed |
| Cerebrovascular disease                      | Binary               | 11.8               | Predictor/ Auxiliary and Default imputed |
| Chronic obstructive pulmonary disease/Asthma | Binary               | 12.5               | Predictor/ Auxiliary and Default imputed |

| <b>Variable</b>                         | <b>Variable Type</b> | <b>Missing (%)</b> | <b>Imputation method</b>                 |
|-----------------------------------------|----------------------|--------------------|------------------------------------------|
| Smoker ever                             | Binary               | 9.3                | Logistic regression                      |
| Diabetes                                | Binary               | 7.1                | Predictor/ Auxiliary and Default imputed |
| Family history of chronic heart disease | Binary               | 31.1               | Predictor/ Auxiliary and Default imputed |
| Care by Cardiologist                    | Binary               | 33.1               | Predictor/ Auxiliary and Default imputed |
| Chronic renal failure                   | Binary               | 11.8               | Predictor/ Auxiliary and Default imputed |
| Congestive cardiac failure              | Binary               | 11.5               | Predictor/ Auxiliary and Default imputed |
| Electrocardiogram appearance            | Categorical          | 3.4                | Polytomous regression                    |
| Preadmission medication                 |                      |                    |                                          |
| Aspirin                                 | Categorical          | 0                  | Predictor/ Auxiliary and Default imputed |
| $\beta$ -blocker                        | Categorical          | 28.1               | Predictor/ Auxiliary and Default imputed |
| Statin                                  | Categorical          | 25.3               | Predictor/ Auxiliary and Default imputed |

| <b>Variable</b>              | <b>Variable Type</b> | <b>Missing (%)</b> | <b>Imputation method</b>                 |
|------------------------------|----------------------|--------------------|------------------------------------------|
| ACEi or ARBs                 | Categorical          | 28.3               | Predictor/ Auxiliary and Default imputed |
| P2Y <sub>12</sub> inhibitor  | Categorical          | 60.0               | Predictor/ Auxiliary and Default imputed |
| Warfarin                     | Categorical          | 20.2               | Predictor/ Auxiliary and Default imputed |
| <b>Discharge medication</b>  |                      |                    |                                          |
| Aspirin                      | Categorical          | 8.4                | Polytomous regression                    |
| P2Y <sub>12</sub> inhibitors | Categorical          | 52.3               | Polytomous regression                    |
| ACEi/ARBs                    | Categorical          | 9.2                | Polytomous regression                    |
| Statin                       | Categorical          | 8.6                | Polytomous regression                    |
| β blockers                   | Categorical          | 16.2               | Polytomous regression                    |
| Aldosterone antagonist       | Categorical          | 56.7               | Polytomous regression                    |
| Enzyme elevation             | Binary               | 9.7                | Predictor/ Auxiliary variable            |
| Admission diagnosis          | Categorical          | 0                  | Predictor/ Auxiliary variable            |
| Admitting consultant         | Binary               | 5.2                | Predictor/ Auxiliary variable            |

| <b>Variable</b>        | <b>Variable Type</b> | <b>Missing (%)</b> | <b>Imputation method</b>      |
|------------------------|----------------------|--------------------|-------------------------------|
| Serum cholesterol      | Continuous           | 26.1               | Predictor/ Auxiliary variable |
| Coronary angiography   | Categorical          | 12.6               | Polytomous regression         |
| Coronary intervention  | Categorical          | 19.4               | Polytomous regression         |
| Cardiac rehabilitation | Categorical          | 11.4               | Polytomous regression         |

**Abbreviations:** ARB – Angiotensin receptor blocker; ACEi – angiotensin-converting enzyme inhibitor; CABG – coronary artery bypass grafting; COPD – chronic obstructive pulmonary disease; PCI – percutaneous coronary intervention.



## Section 4

**eTable 4.** Impact of patient and treatment factors on temporal trends in six months and one year survival between 2004 and 2013, for unadjusted and adjusted flexible parametric survival models (excluding patients with prior statin therapy, N= 119,367).

| Model number | Variables included             | Six months            |         | One year              |         |
|--------------|--------------------------------|-----------------------|---------|-----------------------|---------|
|              |                                | Hazard ratio (95% CI) | P-value | Hazard ratio (95% CI) | P-value |
| Model 1      | Year                           | 0.988 (0.984-0.991)   | <0.001  | 0.986 (0.982-0.989)   | <0.001  |
|              | Year +                         |                       |         |                       |         |
| Model 2      | Age, sex, IMD                  | 0.990 (0.987-0.994)   | <0.001  | 0.989 (0.985-0.992)   | <0.001  |
| Model 3      | PPCI                           | 1.019 (1.015-1.023)   | <0.001  | 1.017 (1.013-1.021)   | <0.001  |
| Model 4      | Comorbidities and risk factors | 0.999 (0.995-1.003)   | 0.531   | 0.998 (0.995-1.002)   | 0.354   |
| Model 5      | Five discharge drugs           | 0.990 (0.985-0.995)   | <0.001  | 0.989 (0.985-0.994)   | <0.001  |
| Model 6      | Aspirin                        | 0.983 (0.979-0.987)   | <0.001  | 0.982 (0.979-0.985)   | <0.001  |
| Model 7      | Statins                        | 0.981 (0.977-0.985)   | <0.001  | 0.980 (0.977-0.983)   | <0.001  |
| Model 8      | P2Y <sub>12</sub> inhibitors   | 1.034 (1.030-1.039)   | <0.001  | 1.027 (1.023-1.032)   | <0.001  |
| Model 9      | ACEi/ARBs                      | 0.985 (0.982-0.989)   | <0.001  | 0.983 (0.980-0.987)   | <0.001  |
| Model 10     | β-blockers                     | 0.989 (0.986-0.993)   | <0.001  | 0.987 (0.984-0.990)   | <0.001  |
| Model 11     | Cardiac rehabilitation         | 0.986 (0.982-0.990)   | <0.001  | 0.984 (0.981-0.987)   | <0.001  |
|              | Year + age + sex + IMD +       |                       |         |                       |         |
| Model 12     | PPCI                           | 1.012 (1.007-1.016)   | <0.001  | 1.010 (1.006-1.014)   | <0.001  |
| Model 13     | Comorbidities and risk factors | 0.996 (0.992-0.999)   | 0.037   | 0.995 (0.992-0.999)   | 0.008   |
| Model 14     | Five discharge drugs           | 0.987 (0.982-0.993)   | <0.001  | 0.988 (0.983-0.992)   | <0.001  |
| Model 15     | Aspirin                        | 0.985 (0.980-0.989)   | <0.001  | 0.984 (0.980-0.987)   | <0.001  |
| Model 16     | Statins                        | 0.983 (0.979-0.986)   | <0.001  | 0.981 (0.978-0.985)   | <0.001  |
| Model 17     | P2Y <sub>12</sub> inhibitors   | 1.036 (1.031-1.041)   | <0.001  | 1.030 (1.025-1.034)   | <0.001  |
| Model 18     | ACEi/ARBs                      | 0.987 (0.983-0.991)   | <0.001  | 0.986 (0.982-0.989)   | <0.001  |

| Model number | Variables included                                                                                                                                                         | Six months            |         | One year              |         |
|--------------|----------------------------------------------------------------------------------------------------------------------------------------------------------------------------|-----------------------|---------|-----------------------|---------|
|              |                                                                                                                                                                            | Hazard ratio (95% CI) | P-value | Hazard ratio (95% CI) | P-value |
| Model 19     | $\beta$ -blockers                                                                                                                                                          | 0.992 (0.988-0.996)   | <0.001  | 0.990 (0.987-0.993)   | <0.001  |
| Model 20     | Cardiac rehabilitation                                                                                                                                                     | 0.989 (0.985-0.993)   | <0.001  | 0.987 (0.984-0.991)   | <0.001  |
| Model 21     | Year + age + sex + IMD + PPCI + Comorbidities and risk factors + Aspirin + Statins + P2Y <sub>12</sub> inhibitors + ACEi/ARBs + $\beta$ -blockers + Cardiac rehabilitation | 1.005 (1.000-1.011)   | 0.069   | 1.006 (1.001-1.012)   | 0.020   |

**Abbreviations:** ACEi – angiotensin-converting enzyme inhibitor; ARBs – Angiotensin receptor blocker; IMD – index of multiple deprivation and PPCI – primary percutaneous coronary intervention.

**eTable 5.** Impact of patient and treatment factors on temporal trends in six months and one year survival between 2004 and 2013, for unadjusted and adjusted flexible parametric survival models (restricted to patients with prior statin therapy only, N=54,151).

| Model number | Variables included             | Six months            |         | One year              |         |
|--------------|--------------------------------|-----------------------|---------|-----------------------|---------|
|              |                                | Hazard ratio (95% CI) | P-value | Hazard ratio (95% CI) | P-value |
| Model 1      | Year                           | 0.994 (0.987-1.001)   | 0.087   | 0.993 (0.986-0.999)   | 0.021   |
|              | Year +                         |                       |         |                       |         |
| Model 2      | Age, sex, IMD                  |                       |         | 0.986 (0.979-0.993)   | <0.001  |
| Model 3      | PPCI                           |                       |         | 1.029 (1.022-1.036)   | <0.001  |
| Model 4      | Comorbidities and risk factors |                       |         | 0.996 (0.989-1.002)   | 0.182   |
| Model 5      | Five discharge drugs           |                       |         | 1.017 (1.008-1.026)   | <0.001  |
| Model 6      | Aspirin                        |                       |         | 0.997 (0.991-1.004)   | 0.433   |
| Model 7      | Statins                        |                       |         | 0.996 (0.990-1.002)   | 0.213   |
| Model 8      | P2Y <sub>12</sub> inhibitors   |                       |         | 1.050 (1.041-1.058)   | <0.001  |
| Model 9      | ACEi/ARBs                      |                       |         | 0.998 (0.992-1.004)   | 0.528   |
| Model 10     | β-blockers                     |                       |         | 1.001 (0.995-1.008)   | 0.614   |
| Model 11     | Cardiac rehabilitation         |                       |         | 0.995 (0.989-1.001)   | 0.122   |
|              | Year + age + sex + IMD +       |                       |         |                       |         |
| Model 12     | PPCI                           |                       |         | 1.011 (1.004-1.019)   | 0.004   |
| Model 13     | Comorbidities and risk factors |                       |         | 0.988 (0.981-0.994)   | <0.001  |
| Model 14     | Five discharge drugs           |                       |         | 1.002 (0.992-1.011)   | 0.725   |
| Model 15     | Aspirin                        |                       |         | 0.990 (0.983-0.997)   | 0.003   |
| Model 16     | Statins                        |                       |         | 0.988 (0.981-0.995)   | 0.001   |
| Model 17     | P2Y <sub>12</sub> inhibitors   |                       |         | 1.039 (1.030-1.048)   | <0.001  |
| Model 18     | ACEi/ARBs                      |                       |         | 0.990 (0.983-0.997)   | 0.003   |
| Model 19     | β-blockers                     |                       |         | 0.994 (0.987-1.001)   | 0.073   |
| Model 20     | Cardiac rehabilitation         |                       |         | 0.988 (0.981-0.995)   | <0.001  |

| Model number | Variables included                                                                                                                                                         | Six months            |         | One year              |         |
|--------------|----------------------------------------------------------------------------------------------------------------------------------------------------------------------------|-----------------------|---------|-----------------------|---------|
|              |                                                                                                                                                                            | Hazard ratio (95% CI) | P-value | Hazard ratio (95% CI) | P-value |
| Model 21     | Year + age + sex + IMD + PPCI + Comorbidities and risk factors + Aspirin + Statins + P2Y <sub>12</sub> inhibitors + ACEi/ARBs + $\beta$ -blockers + Cardiac rehabilitation |                       |         | 1.009 (1.000-1.019)   | 0.057   |

**Abbreviations:** ACEi – angiotensin-converting enzyme inhibitor; ARBs – Angiotensin receptor blocker; IMD – index of multiple deprivation and PPCI – primary percutaneous coronary intervention

## Section 5

**eTable 6.** Mediation analysis modelling for one year survival, by imputation dataset.

| Imputation dataset | Analysis                     | Intervention-mediator effect (path a <sub>1</sub> and a <sub>2</sub> ) | Mediator-outcome effect (path b <sub>1</sub> and b <sub>2</sub> ) | ADE                                                                      | ACME                                                                       | Proportion mediated (%) | P value |
|--------------------|------------------------------|------------------------------------------------------------------------|-------------------------------------------------------------------|--------------------------------------------------------------------------|----------------------------------------------------------------------------|-------------------------|---------|
| 0*                 | P2Y <sub>12</sub> inhibitors | -0.07 (-0.08 to -0.05)                                                 | -0.16 (-0.27 to -0.04)                                            | 7.95×10 <sup>-5</sup> (-4.64×10 <sup>-5</sup> to 1.71×10 <sup>-4</sup> ) | 5.41×10 <sup>-6</sup> (-4.26×10 <sup>-7</sup> to 1.36×10 <sup>-5</sup> )   | -                       | -       |
|                    | Introduction of PPCI         | 0.32 (0.32 to 0.34)                                                    | -0.37 (-0.43 to -0.30)                                            | 1.98×10 <sup>-4</sup> (8.98×10 <sup>-5</sup> to 2.69×10 <sup>-4</sup> )  | -5.07×10 <sup>-5</sup> (-6.62×10 <sup>-5</sup> to -3.80×10 <sup>-5</sup> ) | -32.9 (-100 to -17.1)   | 0.030   |
| 1                  | P2Y <sub>12</sub> inhibitors | 0.79 (0.78 to 0.79)                                                    | -0.23 (-0.29 to -0.19)                                            | -4.50×10 <sup>-6</sup> (-6.77×10 <sup>-5</sup> to 6.1210 <sup>-5</sup> ) | -9.26×10 <sup>-6</sup> (-1.12×10 <sup>-5</sup> to -7.25×10 <sup>-6</sup> ) | -                       | -       |
|                    | Introduction of PPCI         | 0.63 (0.62 to 0.63)                                                    | -0.40 (-0.44 to -0.36)                                            | 1.70×10 <sup>-4</sup> (1.17×10 <sup>-4</sup> to 2.22×10 <sup>-4</sup> )  | -1.98×10 <sup>-5</sup> (-2.29×10 <sup>-5</sup> to -1.67×10 <sup>-5</sup> ) | -13.1 (-21.7 to -9.2)   | <0.001  |

| Imputation dataset | Analysis                     | Intervention-mediator effect (path $a_1$ and $a_2$ ) | Mediator-outcome effect (path $b_1$ and $b_2$ ) | ADE                                                                              | ACME                                                                           | Proportion mediated (%) | P value |
|--------------------|------------------------------|------------------------------------------------------|-------------------------------------------------|----------------------------------------------------------------------------------|--------------------------------------------------------------------------------|-------------------------|---------|
| 2                  | P2Y <sub>12</sub> inhibitors | 0.79 (0.78 to 0.79)                                  | -0.24 (-0.29 to -0.19)                          | $-4.49 \times 10^{-6}$ (-<br>$6.78 \times 10^{-5}$ to<br>$6.11 \times 10^{-5}$ ) | $-9.27 \times 10^{-6}$ ( $-1.13 \times 10^{-5}$<br>to $-7.17 \times 10^{-6}$ ) | -                       | -       |
|                    | Introduction of<br>PPCI      | 0.63 (0.62 to 0.63)                                  | -0.40 (-0.44 to -0.36)                          | $1.70 \times 10^{-4}$ ( $1.17 \times 10^{-4}$<br>to $2.22 \times 10^{-4}$ )      | $-1.97 \times 10^{-5}$ ( $-2.27 \times 10^{-5}$<br>to $-1.67 \times 10^{-5}$ ) | -13.1 (-21.6 to -9.2)   | <0.001  |
| 3                  | P2Y <sub>12</sub> inhibitors | 0.79 (0.78 to 0.79)                                  | -0.24 (-0.29 to -0.19)                          | $-7.11 \times 10^{-6}$ (-<br>$7.09 \times 10^{-5}$ to<br>$5.86 \times 10^{-5}$ ) | $-9.22 \times 10^{-6}$ ( $-1.12 \times 10^{-5}$<br>to $-7.11 \times 10^{-6}$ ) | -                       | -       |
|                    | Introduction of<br>PPCI      | 0.63 (0.62 to 0.63)                                  | -0.40 (-0.44 to -0.36)                          | $1.68 \times 10^{-4}$ ( $1.15 \times 10^{-4}$<br>to $2.20 \times 10^{-4}$ )      | $-1.97 \times 10^{-5}$ ( $-2.27 \times 10^{-5}$<br>to $-1.68 \times 10^{-5}$ ) | -13.4 (-22.2 to -9.3)   | <0.001  |
| 4                  | P2Y <sub>12</sub> inhibitors | 0.79 (0.78 to 0.79)                                  | -0.24 (-0.29 to -0.19)                          | $-1.03 \times 10^{-5}$ (-<br>$7.40 \times 10^{-5}$ to<br>$5.57 \times 10^{-5}$ ) | $-9.20 \times 10^{-6}$ ( $-1.12 \times 10^{-5}$<br>to $-7.18 \times 10^{-6}$ ) | -                       | -       |

| Imputation dataset | Analysis                     | Intervention-mediator effect (path $a_1$ and $a_2$ ) | Mediator-outcome effect (path $b_1$ and $b_2$ ) | ADE                                                                        | ACME                                                                        | Proportion mediated (%) | P value |
|--------------------|------------------------------|------------------------------------------------------|-------------------------------------------------|----------------------------------------------------------------------------|-----------------------------------------------------------------------------|-------------------------|---------|
|                    | Introduction of PPCI         | 0.63 (0.62 to 0.63)                                  | -0.40 (-0.44 to -0.36)                          | $1.66 \times 10^{-4}$ ( $1.12 \times 10^{-4}$ to $2.18 \times 10^{-4}$ )   | $-1.98 \times 10^{-5}$ ( $-2.28 \times 10^{-5}$ to $-1.68 \times 10^{-5}$ ) | -13.6 (-22.9 to -9.4)   | <0.001  |
| 5                  | P2Y <sub>12</sub> inhibitors | 0.79 (0.78 to 0.79)                                  | -0.24 (-0.29 to -0.19)                          | $-5.23 \times 10^{-6}$ ( $-6.87 \times 10^{-5}$ to $6.03 \times 10^{-5}$ ) | $-9.28 \times 10^{-6}$ ( $-1.14 \times 10^{-5}$ to $-7.25 \times 10^{-6}$ ) | -                       | -       |
|                    | Introduction of PPCI         | 0.63 (0.62 to 0.63)                                  | -0.40 (-0.44 to -0.35)                          | $1.69 \times 10^{-4}$ ( $1.16 \times 10^{-4}$ to $2.21 \times 10^{-4}$ )   | $-1.97 \times 10^{-5}$ ( $-2.27 \times 10^{-5}$ to $-1.68 \times 10^{-5}$ ) | -13.2 (-21.7 to -9.2)   | <0.001  |
| 6                  | P2Y <sub>12</sub> inhibitors | 0.79 (0.78 to 0.79)                                  | -0.24 (-0.29 to -0.19)                          | $-6.98 \times 10^{-6}$ ( $-7.04 \times 10^{-5}$ to $5.88 \times 10^{-5}$ ) | $-9.22 \times 10^{-6}$ ( $-1.14 \times 10^{-5}$ to $-7.17 \times 10^{-6}$ ) | -                       | -       |
|                    | Introduction of PPCI         | 0.63 (0.62 to 0.63)                                  | -0.40 (-0.44 to -0.36)                          | $1.67 \times 10^{-4}$ ( $1.14 \times 10^{-4}$ to $2.19 \times 10^{-4}$ )   | $-1.97 \times 10^{-5}$ ( $-2.27 \times 10^{-5}$ to $-1.67 \times 10^{-5}$ ) | -13.4 (-22.3 to -9.2)   | <0.001  |

| Imputation dataset | Analysis                     | Intervention-mediator effect (path a <sub>1</sub> and a <sub>2</sub> ) | Mediator-outcome effect (path b <sub>1</sub> and b <sub>2</sub> ) | ADE                                                                       | ACME                                                                       | Proportion mediated (%) | P value |
|--------------------|------------------------------|------------------------------------------------------------------------|-------------------------------------------------------------------|---------------------------------------------------------------------------|----------------------------------------------------------------------------|-------------------------|---------|
| 7                  | P2Y <sub>12</sub> inhibitors | 0.79 (0.78 to 0.79)                                                    | -0.24 (-0.29 to -0.19)                                            | -6.09×10 <sup>-6</sup> (-6.95×10 <sup>-5</sup> to 5.97×10 <sup>-5</sup> ) | -9.25×10 <sup>-6</sup> (-1.13×10 <sup>-5</sup> to -7.23×10 <sup>-6</sup> ) | -                       | -       |
|                    | Introduction of PPCI         | 0.63 (0.62 to 0.63)                                                    | -0.40 (-0.44 to -0.36)                                            | 1.69×10 <sup>-4</sup> (1.16×10 <sup>-4</sup> to 2.21×10 <sup>-4</sup> )   | -1.97×10 <sup>-5</sup> (-2.28×10 <sup>-5</sup> to -1.67×10 <sup>-5</sup> ) | -13.2 (-22.0 to -9.2)   | <0.001  |
| 8                  | P2Y <sub>12</sub> inhibitors | 0.79 (0.78 to 0.79)                                                    | -0.24 (-0.29 to -0.19)                                            | -6.09×10 <sup>-6</sup> (-6.95×10 <sup>-5</sup> to 5.97×10 <sup>-5</sup> ) | -9.25×10 <sup>-6</sup> (-1.13×10 <sup>-5</sup> to -7.23×10 <sup>-6</sup> ) | -                       | -       |
|                    | Introduction of PPCI         | 0.63 (0.62 to 0.63)                                                    | -0.40 (-0.44 to -0.36)                                            | 1.69×10 <sup>-4</sup> (1.16×10 <sup>-4</sup> to 2.21×10 <sup>-4</sup> )   | -1.97×10 <sup>-5</sup> (-2.28×10 <sup>-5</sup> to -1.67×10 <sup>-5</sup> ) | -13.2 (-22.0 to -9.2)   | <0.001  |
| 9                  | P2Y <sub>12</sub> inhibitors | 0.79 (0.78 to 0.79)                                                    | -0.24 (-0.29 to -0.19)                                            | -2.85×10 <sup>-6</sup> (-6.64×10 <sup>-5</sup> to 6.28×10 <sup>-5</sup> ) | -9.31×10 <sup>-6</sup> (-1.13×10 <sup>-5</sup> to -7.27×10 <sup>-6</sup> ) | -                       | -       |



| Imputation dataset | Analysis                     | Intervention-mediator effect (path a <sub>1</sub> and a <sub>2</sub> ) | Mediator-outcome effect (path b <sub>1</sub> and b <sub>2</sub> ) | ADE                                                                       | ACME                                                                       | Proportion mediated (%) | P value |
|--------------------|------------------------------|------------------------------------------------------------------------|-------------------------------------------------------------------|---------------------------------------------------------------------------|----------------------------------------------------------------------------|-------------------------|---------|
|                    | Introduction of PPCI         | 0.63 (0.62 to 0.63)                                                    | -0.40 (-0.44 to -0.36)                                            | 1.70×10 <sup>-4</sup> (1.17×10 <sup>-4</sup> to 2.22×10 <sup>-4</sup> )   | -1.97×10 <sup>-5</sup> (-2.27×10 <sup>-5</sup> to -1.67×10 <sup>-5</sup> ) | -13.1 (-21.5 to -9.1)   | <0.001  |
| 10                 | P2Y <sub>12</sub> inhibitors | 0.79 (0.78 to 0.79)                                                    | -0.24 (-0.29 to -0.19)                                            | -1.65×10 <sup>-6</sup> (-6.49×10 <sup>-5</sup> to 6.39×10 <sup>-5</sup> ) | -9.34×10 <sup>-6</sup> (-1.13×10 <sup>-5</sup> to -7.29×10 <sup>-6</sup> ) | -                       | -       |
|                    | Introduction of PPCI         | 0.63 (0.62 to 0.63)                                                    | -0.40 (-0.44 to -0.36)                                            | 1.70×10 <sup>-4</sup> (1.17×10 <sup>-4</sup> to 2.22×10 <sup>-4</sup> )   | -1.95×10 <sup>-5</sup> (-2.26×10 <sup>-5</sup> to -1.66×10 <sup>-5</sup> ) | -13.0 (-21.3 to -9.2)   | <0.001  |

**Abbreviations:** PPCI – primary percutaneous coronary intervention. \*Complete case analysis results.

**eTable 7.** Mediation analysis modelling for six months survival, by imputation dataset.

| Imputation dataset | Analysis                     | Intervention-mediator effect (path a <sub>1</sub> and a <sub>2</sub> ) | Mediator-outcome effect (path b <sub>1</sub> and b <sub>2</sub> ) | ADE                                                                      | ACME                                                                       | Proportion mediated (%) | P value |
|--------------------|------------------------------|------------------------------------------------------------------------|-------------------------------------------------------------------|--------------------------------------------------------------------------|----------------------------------------------------------------------------|-------------------------|---------|
| 0*                 | P2Y <sub>12</sub> inhibitors | -0.07 (-0.08 to -0.05)                                                 | -0.02 (-0.15 to 0.11)                                             | 1.48×10 <sup>-4</sup> (-1.97×10 <sup>-5</sup> to 2.66×10 <sup>-4</sup> ) | 8.31×10 <sup>-7</sup> (-6.81×10 <sup>-6</sup> to 8.83×10 <sup>-6</sup> )   | -                       | -       |
|                    | Introduction of PPCI         | 0.32 (0.31 to 0.34)                                                    | -0.39 (-0.47 to -0.32)                                            | 1.69×10 <sup>-4</sup> (-4.29×10 <sup>-5</sup> to 3.10×10 <sup>-4</sup> ) | -8.47×10 <sup>-5</sup> (-1.16×10 <sup>-4</sup> to -6.10×10 <sup>-5</sup> ) | -                       | -       |
| 1                  | P2Y <sub>12</sub> inhibitors | 0.79 (0.78 to 0.79)                                                    | -0.23 (-0.29 to -0.17)                                            | 2.05×10 <sup>-4</sup> (1.17×10 <sup>-4</sup> to 2.90×10 <sup>-4</sup> )  | -1.01×10 <sup>-5</sup> (-1.29×10 <sup>-5</sup> to -7.38×10 <sup>-6</sup> ) | -5.2 (-8.7 to -3.5)     | <0.001  |
|                    | Introduction of PPCI         | 0.63 (0.62 to 0.63)                                                    | -0.43 (-0.48 to -0.39)                                            | 2.16×10 <sup>-4</sup> (1.34×10 <sup>-4</sup> to 2.99×10 <sup>-4</sup> )  | -3.07×10 <sup>-5</sup> (-3.60×10 <sup>-5</sup> to -2.56×10 <sup>-5</sup> ) | -16.7 (-31.2 to -10.8)  | <0.001  |
| 2                  | P2Y <sub>12</sub> inhibitors | 0.79 (0.78 to 0.79)                                                    | -0.23 (-0.29 to -0.17)                                            | 2.06×10 <sup>-4</sup> (1.17×10 <sup>-4</sup> to 2.91×10 <sup>-4</sup> )  | -1.02×10 <sup>-5</sup> (-1.29×10 <sup>-5</sup> to -7.42×10 <sup>-6</sup> ) | -5.2 (-8.6 to -3.4)     | <0.001  |

| Imputation dataset | Analysis                     | Intervention-mediator effect (path $a_1$ and $a_2$ ) | Mediator-outcome effect (path $b_1$ and $b_2$ ) | ADE                                                                      | ACME                                                                        | Proportion mediated (%) | P value |
|--------------------|------------------------------|------------------------------------------------------|-------------------------------------------------|--------------------------------------------------------------------------|-----------------------------------------------------------------------------|-------------------------|---------|
|                    | Introduction of PPCI         | 0.63 (0.62 to 0.63)                                  | -0.43 (-0.48 to -0.39)                          | $2.17 \times 10^{-4}$ ( $1.34 \times 10^{-4}$ to $3.00 \times 10^{-4}$ ) | $-3.06 \times 10^{-5}$ ( $-3.60 \times 10^{-5}$ to $-2.54 \times 10^{-5}$ ) | -16.6 (-30.8 to -10.8)  | <0.001  |
| 3                  | P2Y <sub>12</sub> inhibitors | 0.79 (0.78 to 0.79)                                  | -0.23 (-0.29 to -0.17)                          | $2.02 \times 10^{-4}$ ( $1.14 \times 10^{-4}$ to $2.88 \times 10^{-4}$ ) | $-1.01 \times 10^{-5}$ ( $-1.29 \times 10^{-5}$ to $-7.35 \times 10^{-6}$ ) | -5.3 (-8.9 to -3.4)     | <0.001  |
|                    | Introduction of PPCI         | 0.63 (0.62 to 0.63)                                  | -0.43 (-0.48 to -0.38)                          | $2.13 \times 10^{-4}$ ( $1.30 \times 10^{-4}$ to $2.96 \times 10^{-4}$ ) | $-3.06 \times 10^{-5}$ ( $-3.58 \times 10^{-5}$ to $-2.55 \times 10^{-5}$ ) | -17.0 (-31.8 to 11.0)   | <0.001  |
| 4                  | P2Y <sub>12</sub> inhibitors | 0.79 (0.78 to 0.79)                                  | -0.23 (-0.29 to -0.17)                          | $1.98 \times 10^{-4}$ ( $1.09 \times 10^{-4}$ to $2.83 \times 10^{-4}$ ) | $-1.01 \times 10^{-5}$ ( $-1.29 \times 10^{-5}$ to $-7.31 \times 10^{-6}$ ) | -5.3 (-9.2 to -3.6)     | <0.001  |
|                    | Introduction of PPCI         | 0.62 (0.62 to 0.63)                                  | -0.43 (-0.48 to -0.39)                          | $2.08 \times 10^{-4}$ ( $1.25 \times 10^{-4}$ to $2.92 \times 10^{-4}$ ) | $-3.08 \times 10^{-5}$ ( $-3.60 \times 10^{-5}$ to $-2.56 \times 10^{-5}$ ) | -17.4 (-34.3 to -11.2)  | <0.001  |
| 5                  | P2Y <sub>12</sub> inhibitors | 0.79 (0.78 to 0.79)                                  | -0.23 (-0.29 to -0.17)                          | $2.02 \times 10^{-4}$ ( $1.13 \times 10^{-4}$ to $2.87 \times 10^{-4}$ ) | $-1.01 \times 10^{-5}$ ( $-1.30 \times 10^{-5}$ to $-7.40 \times 10^{-6}$ ) | -5.3 (-8.9 to -3.6)     | <0.001  |

| Imputation dataset | Analysis                     | Intervention-mediator effect (path $a_1$ and $a_2$ ) | Mediator-outcome effect (path $b_1$ and $b_2$ ) | ADE                                                                      | ACME                                                                        | Proportion mediated (%) | P value |
|--------------------|------------------------------|------------------------------------------------------|-------------------------------------------------|--------------------------------------------------------------------------|-----------------------------------------------------------------------------|-------------------------|---------|
|                    | Introduction of PPCI         | 0.63 (0.62 to 0.63)                                  | -0.43 (-0.48 to -0.38)                          | $2.13 \times 10^{-4}$ ( $1.30 \times 10^{-4}$ to $2.96 \times 10^{-4}$ ) | $-3.06 \times 10^{-5}$ ( $-3.60 \times 10^{-5}$ to $-2.53 \times 10^{-5}$ ) | -17.0 (-31.9 to -11.0)  | <0.001  |
| 6                  | P2Y <sub>12</sub> inhibitors | 0.79 (0.78 to 0.79)                                  | -0.23 (-0.28 to -0.17)                          | $2.04 \times 10^{-4}$ ( $1.16 \times 10^{-4}$ to $2.90 \times 10^{-4}$ ) | $-1.02 \times 10^{-5}$ ( $-1.30 \times 10^{-5}$ to $-7.36 \times 10^{-6}$ ) | -5.2 (-8.7 to -3.5)     | <0.001  |
|                    | Introduction of PPCI         | 0.63 (0.62 to 0.63)                                  | -0.43 (-0.48 to -0.38)                          | $2.15 \times 10^{-4}$ ( $1.33 \times 10^{-4}$ to $2.98 \times 10^{-4}$ ) | $-3.05 \times 10^{-5}$ ( $-3.57 \times 10^{-5}$ to $-2.54 \times 10^{-5}$ ) | -16.8 (-31.6 to -10.8)  | <0.001  |
| 7                  | P2Y <sub>12</sub> inhibitors | 0.79 (0.78 to 0.79)                                  | -0.23 (-0.29 to -0.17)                          | $2.05 \times 10^{-4}$ ( $1.16 \times 10^{-4}$ to $2.90 \times 10^{-4}$ ) | $-1.02 \times 10^{-5}$ ( $-1.31 \times 10^{-5}$ to $-7.47 \times 10^{-6}$ ) | -5.3 (-8.7 to -3.6)     | <0.001  |
|                    | Introduction of PPCI         | 0.63 (0.62 to 0.63)                                  | -0.43 (-0.48 to -0.38)                          | $2.15 \times 10^{-4}$ ( $1.33 \times 10^{-4}$ to $2.98 \times 10^{-4}$ ) | $-3.06 \times 10^{-5}$ ( $-3.59 \times 10^{-5}$ to $-2.54 \times 10^{-5}$ ) | -16.7 (-31.5 to -10.8)  | <0.001  |
| 8                  | P2Y <sub>12</sub> inhibitors | 0.79 (0.78 to 0.79)                                  | -0.23 (-0.29 to -0.17)                          | $2.05 \times 10^{-4}$ ( $1.16 \times 10^{-4}$ to $2.90 \times 10^{-4}$ ) | $-1.02 \times 10^{-5}$ ( $-1.31 \times 10^{-5}$ to $-7.47 \times 10^{-6}$ ) | -5.3 (-8.7 to -3.6)     | <0.001  |

| Imputation dataset | Analysis                     | Intervention-mediator effect (path $a_1$ and $a_2$ ) | Mediator-outcome effect (path $b_1$ and $b_2$ ) | ADE                                                                      | ACME                                                                        | Proportion mediated (%) | P value |
|--------------------|------------------------------|------------------------------------------------------|-------------------------------------------------|--------------------------------------------------------------------------|-----------------------------------------------------------------------------|-------------------------|---------|
|                    | Introduction of PPCI         | 0.63 (0.62 to 0.63)                                  | -0.43 (-0.48 to -0.38)                          | $2.15 \times 10^{-4}$ ( $1.33 \times 10^{-4}$ to $2.98 \times 10^{-4}$ ) | $-3.06 \times 10^{-5}$ ( $-3.59 \times 10^{-5}$ to $-2.54 \times 10^{-5}$ ) | -16.7 (-31.5 to -10.8)  | <0.001  |
| 9                  | P2Y <sub>12</sub> inhibitors | 0.79 (0.78 to 0.79)                                  | -0.23 (-0.29 to -0.17)                          | $2.01 \times 10^{-4}$ ( $1.12 \times 10^{-4}$ to $2.87 \times 10^{-4}$ ) | $-1.01 \times 10^{-5}$ ( $-1.29 \times 10^{-5}$ to $-7.35 \times 10^{-6}$ ) | -5.3 (-8.9 to -3.6)     | <0.001  |
|                    | Introduction of PPCI         | 0.63 (0.62 to 0.63)                                  | -0.43 (-0.48 to -0.38)                          | $2.11 \times 10^{-4}$ ( $1.29 \times 10^{-4}$ to $2.95 \times 10^{-4}$ ) | $-3.07 \times 10^{-5}$ ( $-3.60 \times 10^{-5}$ to $-2.54 \times 10^{-5}$ ) | -17.2 (-32.7 to -11.0)  | <0.001  |
| 10                 | P2Y <sub>12</sub> inhibitors | 0.79 (0.78 to 0.79)                                  | -0.23 (-0.29 to -0.18)                          | $2.05 \times 10^{-4}$ ( $1.16 \times 10^{-4}$ to $2.90 \times 10^{-4}$ ) | $-1.03 \times 10^{-5}$ ( $-1.31 \times 10^{-5}$ to $-7.53 \times 10^{-6}$ ) | -5.8 (-8.8 to -3.6)     | <0.001  |
|                    | Introduction of PPCI         | 0.63 (0.62 to 0.63)                                  | -0.43 (-0.48 to -0.38)                          | $2.15 \times 10^{-4}$ ( $1.33 \times 10^{-4}$ to $2.98 \times 10^{-4}$ ) | $-3.03 \times 10^{-5}$ ( $-3.57 \times 10^{-5}$ to $-2.51 \times 10^{-5}$ ) | -16.7 (-30.7 to -10.8)  | <0.001  |

**Abbreviations:** PPCI – primary percutaneous coronary intervention. \*Complete case analysis results.

**eTable 8.** Impact of patient and treatment factors on temporal trends in six months and one year survival between 2004 and 2013, for unadjusted and adjusted flexible parametric survival models (including in-hospital deaths) (complete case analysis, n=137,111).

| Model number | Variables included                                  | Six months            |         | One year              |         |
|--------------|-----------------------------------------------------|-----------------------|---------|-----------------------|---------|
|              |                                                     | Hazard ratio (95% CI) | P value | Hazard ratio (95% CI) | P value |
| Model 1      | Year                                                | 0.96 (0.95-0.97)      | <0.001  | 0.96 (0.95-0.97)      | <0.001  |
|              | Year +                                              |                       |         |                       |         |
| Model 2      | Age, sex, IMD                                       | 0.96 (0.95-0.96)      | <0.001  | 0.96 (0.95-0.96)      | <0.001  |
| Model 3      | Age, sex, IMD, Comorbidities and risk factors       | 0.96 (0.95-0.96)      | <0.001  | 0.96 (0.95-0.96)      | <0.001  |
| Model 4      | Age, sex, IMD, Comorbidities and risk factors, PPCI | 1.02 (1.01-1.03)      | <0.001  | 1.02 (1.01-1.03)      | <0.001  |

**Abbreviations:** ACEi – angiotensin-converting enzyme inhibitor and ARBs – Angiotensin receptor blocker; IMD – index of multiple deprivation; PPCI – primary percutaneous coronary intervention.

**eTable 9.** Mediation analysis modelling (including in-hospital deaths), by survival time (complete case analysis, n=137,111).

| Survival time | Analysis             | Intervention-mediator effect (path a <sub>1</sub> and a <sub>2</sub> ) | Mediator-outcome effect (path b <sub>1</sub> and b <sub>2</sub> ) | ADE                                                                     | ACME                                                                       | Proportion mediated (%) | P value |
|---------------|----------------------|------------------------------------------------------------------------|-------------------------------------------------------------------|-------------------------------------------------------------------------|----------------------------------------------------------------------------|-------------------------|---------|
| One year      | Introduction of PPCI | 0.60 (0.60-0.61)                                                       | -0.66 (-0.71 to -0.62)                                            | 0.006 (0.005 to 0.007)                                                  | -0.0007 (-0.0008 to -0.0006)                                               | -12.7 (-16.6 to -10.0)  | <0.001  |
| Six months    | Introduction of PPCI | 0.60 (0.60-0.61)                                                       | -0.71 (-0.76 to -0.67)                                            | 5.68×10 <sup>-4</sup> (3.61×10 <sup>-4</sup> to 7.27×10 <sup>-4</sup> ) | -1.07×10 <sup>-4</sup> (-1.26×10 <sup>-4</sup> to -9.07×10 <sup>-5</sup> ) | -22.6 (-44.6 to -16.1)  | <0.001  |

**Abbreviations:** PPCI – primary percutaneous coronary intervention.

## References

- 1 Tingley D, Yamamoto T, Hirose K, et al. Mediation: R package for causal mediation analysis. 2014.
- 2 Imai K, Keele L, Tingley D, et al. Causal mediation analysis using R. *Advances in social science research using R*: Springer 2010:129-54.
- 3 Imai K, Keele L, Yamamoto T. Identification, inference and sensitivity analysis for causal mediation effects. *Statistical science* 2010:51-71.
- 4 Linden A, Karlson KB. Using mediation analysis to identify causal mechanisms in disease management interventions. *Health Services and Outcomes Research Methodology* 2013;**13**:86-108.
- 5 Kenny DA. Mediation. Department of Psychological Sciences, University of Connecticut: <http://davidakenny.net/cm/mediate.htm> [Accessed 12 December 2017] 2015.
- 6 Cattle B, Baxter P, Greenwood D, et al. Multiple imputation for completion of a national clinical audit dataset. *Stat Med* 2011;**30**:2736-53.
- 7 Somma KA, Bhatt DL, Fonarow GC, et al. Guideline adherence after ST-segment elevation versus non-ST segment elevation myocardial infarction. *Circ Cardiovasc Qual Outcomes* 2012;**5**:654-61.
